# Supplementary material for: Orphan CpG islands boost the regulatory activity of poised enhancers and dictate the responsiveness of their target genes
Source: bioRxiv or medRxiv preprint supplement (doi:10.1101/2020.08.05.237768), 2020-08-05
Supplement: Supplementary file [file media-2.pdf]

## Supplementary Data 2: Knock-in donor templates

Legend: Homology arm TFBS module CGI module

### PE Sox1(+35)TFBS in Gata6 TAD

```
TCTACTGGCACATGCAGGACGACCTCAATGAGTATTGTGTTGGAATTAATGAAAGCTTGACTATGCTCAAGGAGTAGGTTGGTTCTTTGGCTGACCTCGATGAGGAA
GAGACCTTGGGTGGAAAAAGAGCAGGAGAGTGGGATCTCATAACTCAGGACACTAGTGCCAGTACCCAAAAAGCGGGGGSTAGGAGGGAGCCGCTTGCCATTAAT
CTGGGAACAAACAGCTAACCCCGGTGACTGGTATTTTCTCTTTCTTTCTCAGTGTGGGAAGGCGATTGTGAGGCGCTCTGCTGGAATTTGGCAGC
GCGGAGGCTTGGAGAGCAGCCCATGCTGGCTCCTATTAGCCGGCCAGTTTTCCTCGAGCTTTGGAAGTTTCACTCAGCCGTGCACTCAATGGCTTCACAAAGCTG
ATTACAAGCTTCAGCGCATTCCTGAAGGACCCAAAAGCGACGAGGTGCAAAACGAGCCGAGGAGCCCTTATCCCGGTGACAGAATGGGACAAGCTGGGAAAGGCT
TGGACCACACAAATCCAAGGCTCACCAGGCAGCAGAGACCTGCCTTGGGAACCGGGGGTCAATTATCCGCCCTATTACAGCGGGACCGGGACCCCTGGGGCCAAGGAG
GCCGGCCGGGC GCCAGTACCCAAAAAGCGGGGGAGCGCTTCTGGAACCTCCCTAAGCCCTCTGGCTTCAGCTCTATTGAGATGGATTCAAGTGTCAAGGGAA
GACAGAATTTGAGTAGAGTGAAGTCTTCAATAAGAAGTCTGCCCCA
```

### PE Sox1(+35)CGI in Gata6 TAD

```
TCTACTGGCACATGCAGGACGACCTCAATGAGTATTGTGTTGGAATTAATGAAAGCTTGACTATGCTCAAGGAGTAGGTTGGTTCTTTGGCTGACCTCGATGAGGAA
GAGACCTTGGGTGGAAAAAGAGCAGGAGAGTGGGATCTCATAACTCAGGACACTAGTGCCAGTACCCAAAAAGCGGGGGSTAGGAGGGAGCCGCTTGCCATTAAT
CTGGGAACAAACAGCTAACCCCGGTGACTGGTATTTTCTCTTTCTTTCTCAGTGTGGGAAGGCGATTGTGAGGCGCTCTGCTGGAATTTGGCAGC
GCGGAGGCTTGGAGAGCAGCCCATGCTGGCTCCTATTAGCCGGCCAGTTTTCCTCGAGCTTTGGAAGTTTCACTCAGCCGTGCACTCAATGGCTTCACAAAGCTG
ATTACAAGCTTCAGCGCATTCCTGAAGGACCCAAAAGCGACGAGGTGCAAAACGAGCCGAGGAGCCCTTATCCCGGTGACAGAATGGGACAAGCTGGGAAAGGCT
TGGACCACACAAATCCAAGGCTCACCAGGCAGCAGAGACCTGCCTTGGGAACCGGGGGTCAATTATCCGCCCTATTACAGCGGGACCGGGACCCCTGGGGCCAAGGAG
GCCGGCCGGGC GCAATCGATGTCATTATCCGCCCTATTACAGCGGGACCGGGGACCCTGGGGCCAAGGAGCCGCGCGGGCGCAAGGCCACCGCCAGTACCGCCCTG
CAGCAGTGGGGACCCCGCTGGGCGTTGCAACCCGTCGGGATGTTGGGCGCTGCGTTGTTCACCACGACAGCGGTACGCGAAATCCATCCTGCGGGTGAAGCCGGT
GTCCAGGCTAACCCGGATACAGGAGAAGGAGGTAGCGAAGATGCTCAGTGGTGGACAGTGCCTAATTTGGTAAATCGAGGCCGCACTGACGTGGTCTGCTCAG
GCCACTCTCAGCCCATCCTATCCCTGCTCGGGCCCGGTCGCCCTCAGCTTGTCTTCAATTTTCTGCTCTATGAGTCACTAGAGCAGACCTCAGAAAAGTGGCGT
GGTGGCGGTGGGTGGTGGTGGGGGGTTCAGGGCCGGGAATCTGGCTGGTAGCCCGCAGGATCAGATCACCAGGTTGTCCAGTGCACCTGCGGGGAGTGG
CGAGGCTGGAGAGCCGCTCTGCTGGGAGAATTAACGACGTCACAGCCAGAGACCAAAGAACTACAGTTCGGGGGACAGGCTGGCTCCAGGGTATAGCTTGCAC
AAGGACGAGGCTGGGACAGACTGAGGTGGGACTGTTGTAGTTTCAGGGCCCGCCGATCCGGCTCCGTAGGCTGCCCTATGTCCCTCCCTCGCCCATCCAGGCCA
GCACAGCAGGATTAACGCCAGCTAGAGCCCTCCCGCCGCTCCTCCACTCCCGCCCGGCTCCTCGAAGCCACAGCCAGCCCGGCTTGGCCCGGTCACCC
CGAGGTGCCCGGTCAGGGCCGGGCGGCGAGGGCGGCTTCCGACGCTCTTTGCTGCCAGTACCCAAAAAGCGGGGGAGCGGTTCCTGGAACCTCCCTA
GCCCTCTGGCTTCAGCTCTATTGAGATGGATTCAAGTGTCAAGGGAAAGACAGAATTTGAGTAGAGTGAAGTCTTCAATAAGAAGTCTGCCCCA
```

### PE Sox1(+35)TFBS+CGI in Gata6 TAD

```
TCTACTGGCACATGCAGGACGACCTCAATGAGTATTGTGTTGGAATTAATGAAAGCTTGACTATGCTCAAGGAGTAGGTTGGTTCTTTGGCTGACCTCGATGAGGAA
GAGACCTTGGGTGGAAAAAGAGCAGGAGAGTGGGATCTCATAACTCAGGACACTAGTGCCAGTACCCAAAAAGCGGGGGSTAGGAGGGAGCCGCTTGCCATTAAT
CTGGGAACAAACAGCTAACCCCGGTGACTGGTATTTTCTCTTTCTTTCTCAGTGTGGGAAGGCGATTGTGAGGCGCTCTGCTGGAATTTGGCAGC
GCGGAGGCTTGGAGAGCAGCCCATGCTGGCTCCTATTAGCCGGCCAGTTTTCCTCGAGCTTTGGAAGTTTCACTCAGCCGTGCACTCAATGGCTTCACAAAGCTG
ATTACAAGCTTCAGCGCATTCCTGAAGGACCCAAAAGCGACGAGGTGCAAAACGAGCCGAGGAGCCCTTATCCCGGTGACAGAATGGGACAAGCTGGGAAAGGCT
TGGACCACACAAATCCAAGGCTCACCAGGCAGCAGAGACCTGCCTTGGGAACCGGGGGTCAATTATCCGCCCTATTACAGCGGGACCGGGACCCCTGGGGCCAAGGAG
GCCGGCCGGGC GCAATCGATGTCATTATCCGCCCTATTACAGCGGGACCGGGGACCCTGGGGCCAAGGAGCCGCGCGGGCGCAAGGCCACCGCCAGTACCGCCCTG
CAGCAGTGGGGACCCCGCTGGGCGTTGCAACCCGTCGGGATGTTGGGCGCTGCGTTGTTCACCACGACAGCGGTACGCGAAATCCATCCTGCGGGTGAAGCCGGT
GTCCAGGCTAACCCGGATACAGGAGAAGGAGGTAGCGAAGATGCTCAGTGGTGGACAGTGCCTAATTTGGTAAATCGAGGCCGCACTGACGTGGTCTGCTCAG
GCCACTCTCAGCCCATCCTATCCCTGCTCGGGCCCGGTCGCCCTCAGCTTGTCTTCAATTTTCTGCTCTATGAGTCACTAGAGCAGACCTCAGAAAAGTGGCGT
GGTGGCGGTGGGTGGTGGTGGGGGGTTCAGGGCCGGGAATCTGGCTGGTAGCCCGCAGGATCAGATCACCAGGTTGTCCAGTGCACCTGCGGGGAGTGG
CGAGGCTGGAGAGCCGCTCTGCTGGGAGAATTAACGACGTCACAGCCAGAGACCAAAGAACTACAGTTCGGGGGACAGGCTGGCTCCAGGGTATAGCTTGCAC
AAGGACGAGGCTGGGACAGACTGAGGTGGGACTGTTGTAGTTTCAGGGCCCGCCGATCCGGCTCCGTAGGCTGCCCTATGTCCCTCCCTCGCCCATCCAGGCCA
GCACAGCAGGATTAACGCCAGCTAGAGCCCTCCCGCCGCTCCTCCACTCCCGCCCGGCTCCTCGAAGCCACAGCCAGCCCGGCTTGGCCCGGTCACCC
CGAGGTGCCCGGTCAGGGCCGGGCGGCGAGGGCGGCTTCCGACGCTCTTTGCTGCCAGTACCCAAAAAGCGGGGGAGCGGTTCCTGGAACCTCCCTA
GCCCTCTGGCTTCAGCTCTATTGAGATGGATTCAAGTGTCAAGGGAAAGACAGAATTTGAGTAGAGTGAAGTCTTCAATAAGAAGTCTGCCCCA
```

### PE Sox1(+35)TFBS+aCGI in Gata6 TAD

```
TCTACTGGCACATGCAGGACGACCTCAATGAGTATTGTGTTGGAATTAATGAAAGCTTGACTATGCTCAAGGAGTAGGTTGGTTCTTTGGCTGACCTCGATGAGGAA
GAGACCTTGGGTGGAAAAAGAGCAGGAGAGTGGGATCTCATAACTCAGGACACTAGTGCCAGTACCCAAAAAGCGGGGGSTAGGAGGGAGCCGCTTGCCATTAAT
CTGGGAACAAACAGCTAACCCCGGTGACTGGTATTTTCTCTTTCTTTCTCAGTGTGGGAAGGCGATTGTGAGGCGCTCTGCTGGAATTTGGCAGC
GCGGAGGCTTGGAGAGCAGCCCATGCTGGCTCCTATTAGCCGGCCAGTTTTCCTCGAGCTTTGGAAGTTTCACTCAGCCGTGCACTCAATGGCTTCACAAAGCTG
ATTACAAGCTTCAGCGCATTCCTGAAGGACCCAAAAGCGACGAGGTGCAAAACGAGCCGAGGAGCCCTTATCCCGGTGACAGAATGGGACAAGCTGGGAAAGGCT
TGGACCACACAAATCCAAGGCTCACCAGGCAGCAGAGACCTGCCTTGGGAACCGGGGGTCAATTATCCGCCCTATTACAGCGGGACCGGGACCCCTGGGGCCAAGGAG
GCCGGCCGGGC GCAATCGATGTCACCAGTCAAGGACCGCGGCTCCTTCTACCGTCTGCCCCAGGAGTGGGTTGGACACCTCCGGTAGGTGGCGTCAGACCC
ACACCGAGCGCTGCTACCGCCGACCCCTACTGTTGGCCCGTGGAGGGTGGAGTGGGGGACGCGCACCCAGACCTGCGGGTACCCACCGGGCTCGTGGGACAGGAG
TAGGCTTGGGAGCTCACCTCGAGGGAACCCGGCGCCACCCGCTCCCTTAGCCGTGGGACCACTCCGACCCAGGCTGGGTTGCCACTACCGCGGCTCTAAGGG
GAGGTGGGACGGGCTCCAGTGGGCGAGGGTCTCTGGGAGGTCCTCCTGGCCAGCAACGGGGGCTAGGCTAGGAGCCCGGACCTTGGCCAGCCTTAGGCG
ACCCACCTAGGCTACTGTTGGGACAGACCCCTGGCTGCGTGGGACCGCCACCACTGCCAGCTCCTCGAGAGTGGCGTCCAGGCTGGGTCGGGCTCCGA
GGCTGCTGTGGCTCGCAGACCCGCTGGGCCAAACCCGAGGCGGGTGGCCCTTTCCGAGCCCGGACCCAGCGGCAAGTCTGGAAGCCAGCCTGGCC
AAGGACGGAGGGCCACCGACCGCTCGGTTCCCGGAGCGCGGAGGACTGGCTACAGGGCCCTGCCGACGGCTAGGCTGGAGCTTCGGAGGTGCTCAGACTT
```

CCATCGGGGCGAGACCCGGAGTCGTGCCACCCGGGTTTCAGGAGTGACGGTGGGACAACGCGTTCCTGGAACTCCCTAAGCCCTCTGGCTCAGCTCTATTTG  
AGATGGATTCAAGGGGAAGACAGAATTTGAGTAGAGTGAAGTCTTCAATAAGAACTGCTGCCA

### PE *Wnt8b*(+21)TFBS in *Gata6* TAD

TCTACTGGCACATGCAGGACGACCTCAATGAGTATTTGTTGGAATTAATGAAAGCTTGACTATGCTCAAGGAGTAGGTTGGTTCTTTGGCTGACCTCGATGAGGAA  
GAGACCTTGGGTGGAAAAAGAGCAGGAGAGTGGGATCTCATAACTCAGCACACTAGTGATCTCCCTCCTCTGTGGGCTCTAAGGAGCCCATCTGTCTCAGTCT  
GAGGACAGAAGGAGAGGGGGGCTTGTAGAAGTGACAAGAACCTGGGTAGGTTGAGCAAAACACTGTCTCCTTCCCTGCCCTGGCTGGTGAAGCTACACATAAGCA  
GGGCTTTCTTTTAAAGAAATCCACCCCTCACTTGGCTCAGGAGCAGGTCAGTGGGAGAGAGAAAGGCTCCTCCTTGGCAGCTGGTAGCGTGGTGGTGGT  
GGGAGGAGGGCAGCCAGGCACTGCCTATTGGGTCTGGATGCTTCCACTATTCTTTCTTTAATTAACCCACATCTCCTGGAGAGAAATATTTA  
TGTGGCTCCCATAGAGCAACCCCTCAGACTGGAAAGAGGGGAAAGCCCTGTCTTAGCAAAAACAATATCTCTAAAGAGCTCAAGAAGAGAAAAATGGGGAAACA  
AAATGCCATTAAACAGCCTTCTACCCCGCCGGAGTCAATGAAAACCTTCACTTTCACATGTTAATCCGCCACTCCGCCCCCTTCTTCTCACAACACCTTTTCGGAA  
AGTGTTTGGGAAAAGTCTTGGCAGTCAGTACACAGCTCCCTGCAGCTCAGACTTCTCCTTGTGTAGTTTCAAGGCCCCGAGTGGGGCTCTCGCTCCAGCAGCGGCTT  
TTCTCTCCCCCTCCTTTAATTTAAACAAAGACTTCAGAGTTTCACTCAACCTCCCACTGAAATTCACAGCTGCTGAACAACTAATCCCTCTCCCCGCTTTCTTCC  
CTTCAATGGGCTCTTGGCTTCAAGACACTTTGGAAAGGACTTTGCTGGGGCTCACACTGCTTCAATAAGAAGTTAGCACAAGTATTAATCTGAAGGCAAGTGG  
CTTTACAAACAATACTGCTTAAACAATCCCTCCCTCCCAACACACATCTAGCCTGCAGACATGATGGATGGACAACAGGATAGGCTGGTACCCCTGGGCTT  
ACACCCAGGCCCTTTGTGCAGCTGAACCTCAGCCCTGAAGTGGTGTGGGGAAACCCTGCAGCTCACTGTGAGGACAGATGGAGACAGACAACGCGTTCCTGGAAAC  
TCCCTAAGCCCTCTGGCTCAGCTCTATTTGAGATGGATTCAAGTGTCAAGGGGAAGACAGAATTTGAGTAGAGTGAAGTCTTCAATAAGAACTGCTGCCA

### PE *Wnt8b*(+21)CGI in *Gata6* TAD

TCTACTGGCACATGCAGGACGACCTCAATGAGTATTTGTTGGAATTAATGAAAGCTTGACTATGCTCAAGGAGTAGGTTGGTTCTTTGGCTGACCTCGATGAGGAA  
GAGACCTTGGGTGGAAAAAGAGCAGGAGAGTGGGATCTCATAACTCAGCACACTAGTCCAATCGTCTGGCCACTCACTAGTAGGCGCCTGGCAACTGTCCAGCT  
CGGGTGGCTTACGTGCTGCTCTCTCCCCAGGCGGTCAAGGGCACCATGAAACGCACGTGTAAGTGCCACGGTGTGTCCGGCAGCTGCACCACGCAGACCTGTGGT  
TGCAACTGCCAGAGTTCCGGGAGGTAGGCGGCACCTGAAGGAGAAGTATCATGCGGCGCTCAAGGTGGACCTGTGCAAGGCGGGGCAACAGCCGCGGGCCCG  
GGAGCCATCGCCGACACTTCCGCTCCATCTCCACCCCGGAGCTGGTGCATCTGGAGGACTCCCCAGACTACTGCTGGAGAACAAGACCTGGGGCTGTGGGCAC  
CGAGGGCCGAGAGTGTCTGCGGCGGGCGGCCCTGGGTGCTGGGAGCGCCGAGTTGTCGCCGCTGTGCGGGGACTGCGGGCTAGCGGTGGAGGAGCGCCGG  
CCGAGACAGTGTCCAGCTGCAACTGCAAGTTTCACTGGTGTGCGCGGTCCGCTGCGAGCAGTCCCGCCGGCGGGTCAACAAGTACTTCTGCAGCCGCGCAGAGCGG  
CGGCCAGAGGCGCTGCGCACAAACCCGGGAAAGAACTCCTAAGGGTATCTATCCCTCCCGCTCCACCCCTGTTCGCTCCCGGCTTCTTTAGAGACCCGATCAGC  
CGTTCCTGGAACTCCCTAAGCCCTCTGGCTCAGCTCTATTTGAGATGGATTCAAGTGTCAAGGGGAAGACAGAATTTGAGTAGAGTGAAGTCTTCAATAAGAA  
TGCTGCCA

### PE *Wnt8b*(+21)TFBS+CGI in *Gata6* TAD

TCTACTGGCACATGCAGGACGACCTCAATGAGTATTTGTTGGAATTAATGAAAGCTTGACTATGCTCAAGGAGTAGGTTGGTTCTTTGGCTGACCTCGATGAGGAA  
GAGACCTTGGGTGGAAAAAGAGCAGGAGAGTGGGATCTCATAACTCAGCACACTAGTCCAATCGTCTGGCCACTCACTAGTAGGCGCCTGGCAACTGTCCAGCT  
CGGGTGGCTTACGTGCTGCTCTCTCCCCAGGCGGTCAAGGGCACCATGAAACGCACGTGTAAGTGCCACGGTGTGTCCGGCAGCTGCACCACGCAGACCTGTGGT  
TGCAACTGCCAGAGTTCCGGGAGGTAGGCGGCACCTGAAGGAGAAGTATCATGCGGCGCTCAAGGTGGACCTGTGCAAGGCGGGGCAACAGCCGCGGGCCCG  
GGAGCCATCGCCGACACTTCCGCTCCATCTCCACCCCGGAGCTGGTGCATCTGGAGGACTCCCCAGACTACTGCTGGAGAACAAGACCTGGGGCTGTGGGCAC  
CGAGGGCCGAGAGTGTCTGCGGCGGGCGGCCCTGGGTGCTGGGAGCGCCGAGTTGTCGCCGCTGTGCGGGGACTGCGGGCTAGCGGTGGAGGAGCGCCGG  
CCGAGACAGTGTCCAGCTGCAACTGCAAGTTTCACTGGTGTGCGCGGTCCGCTGCGAGCAGTCCCGCCGGCGGGTCAACAAGTACTTCTGCAGCCGCGCAGAGCGG  
CGGCCAGAGGCGCTGCGCACAAACCCGGGAAAGAACTCCTAAGGGTATCTATCCCTCCCGCTCCACCCCTGTTCGCTCCCGGCTTCTTTAGAGACCCGATCCTC  
CCTCCTTGTGGGCTCTAAGGAGCCATCTGTCTCAGTCTGAGGACAGAAGGAGGGGGGCTCCTGAGAAGTGACAAGAACTCTGGGTAGGTTGAGCAAAACAC  
TGCTCCTTCCCTGCCCTGGCTGGTGGAGCTACACATAAGCAGGGCTTTCTTTCTTTAAAGAAATCCACCCCTCACTTGGCTCAGGAGCAGGTCAGTGCGGAGAG  
AGAAAGCTCCTCCTTGGCAGCTGGTAGCGTGGTGGTGGGAGGAGGGCAGGCCAGGACCTCGCTATTGTTGGTCTGGATTGGATGCTTCCACTATTCTG  
TTCTCTTTAATTAACCCACATCTCTGGAGGAGAAATATTTATGTTGGCTCCATAGAGGCAACCCCTCAGACTGGAAGAAGGGGAAAGAAAGCCTGCTTAGCAAA  
ACAATATCTTAAGAGCTCAAGAAGAGAAAAATAGGGAAACAAATGCCATTAACAGCCTTCTACCCCGCGGAGTCAATGAAACTTCAATTCACATGTTAAT  
CCGCCACTCGCCCTTCTCTTCTCACAACACCTTTTCGAAAGTGTTTGGGAAAGCTTGGCAGTCACTACACAGCTCCCTGCAGCTCAGACTTCTCCTTGTGTT  
AGTTAGGGCCCGAGTGGGGCTCTCGCTCCAGCAGCGGCTTTTCTCTCCCCCTCCTTTAATTTAAACAAAGACTTCAGAGTTCATCAACCTCCCACTGAAATTC  
CAGCTGCTGAACAACTAATCCCTCTCCCCGCTTCTTCCCTTCAATGGGCTCTGGCTTCAAAGACACTTTGGGAAAGGACTTTGCTGGGGCTCACACTGCTT  
ATCAATAGAAGTTAGCACAAGTATTTATCTGAAGAGCAAGTGGCTTTACAAACAATACTGCTTAACAATCCCTCCCTCCCAACACACACATCTAGCCTGCAGACAT  
GATGGATGGACAACAGGATTAGGCTGGTACCCCTGGCTTACACCCAGGCCCTTTGTGCAGCTGAACCTCAGCCCTGAAGTGGTGTGGGGAAACCCTGCAGCTCA  
CTGTCAAGGACAGATGGAGACAGACAACGCGTTCCTGGAACTCCCTAAGCCCTCTGGCTTCAAGTGTCAAGGGGAAGACAGAATTTGAGTAGAGTGAAGTCTTCAATAAGAA  
TTGAGTAGAGTGAAGTCTTCAATAAGAACTGCTGCCA

### PE *Sox1*(+35)TFBS in *Foxa2* TAD

AGGGCATCAGCTCAGGATGATTCAAAGATTAAAGAGGTGTGAGAACAATGCCTTCTCTTAACCAAGCTGTCTGTCTGTCTCAGGGTTTGGGCCAAA  
CCATTCTGTGGCTTGTATGTGGTTCACAGCTAGACCTCAGAAAGAAATTTAAAGAACAGATGAAAAATGACAGTGAAGGCTCTATGATAAGATCCTAGTGCCAG  
TACCCAAAAGCGGGGGTAGGAGGAGCCGCTTGCATTAATCTGGAAACAACAGCTAACCCCGGTGACTGGTATTTTCTTTTCTTTCTCAGCTTTTCTCAGT  
GTGGGAAAGCGGATTTGAGGCGCTCTGCTGGAATTTGGCAGCGCGGAGGCTTGGAGAGCAGCCCATGCTGGCTCCTATTAGCCGCGGAGTTTCTCGAGCTTT  
GGAAGTTTCACTCAGCGTCACTCAATGGCTTCAACAAGCTGATTAACAAGCTTCAAGGACTTCTGAAGGACCAAAAGCCAGCCAGCTGCAACAGGCGGAGGAA  
GCTCCTTATCCCGGTGACAGAATGGACAAGCTGGAAAGGCTTGGACACACAATACTCAAGGCTCACCAGGACAGAGAGCTCCCTTGGGAACCCGGGGCTCATT  
ATCCGCCCTATTAGCGGGACCGGGGACCTGGGGCAAGGAGGCCGCGCGGCGCCAGTACCCAAAAGCGGGGGGACCGCTTGGAGCCCTGGATTAGCTCCCA  
GCAATAAATTTCAATAACTTGTACAGTATTCAGCTTACTACTTGAAAAAACACTGCAAGGAAATTTATTTGAGAAATGAGGAGAAAGGTTGGGAAATGACTAAGATA  
GGAGAATTGCTTTGGTTTTTTTGTTTTAAACAATGACCATAAAGCAAGGACAGGGTAGGGTGTGGAGTGAATAATGAGCCATTGCCTAATGATTAT



CAGGTGCAAACGAGCCGAGGGAGCCCTTATCCCGGTGACAGAATGGGACAAGCTGGGAAGGCTTGGACCACACAAATCCAAGGCTCACCAGGCAGCAGAGCCT  
GCCTTGGGAACCGGGGTATTATCCGCCTATTACGCGGACCGGGACCTTGGGCAAGGAGGCGGGCCGCAATCGATGTCATTATCCGCCCTATTACG  
GGGACCGGGACCCCTGGGGCCAAGGAGCCGCGGGGCGCAAGCGCCACCGCCAGTACGCGCCTGCAGCAGTGGGGACCCCGCTGGGCCTTGCACCCCTCGGGATG  
TTGGGCGCTGCGTTTGTCCACCGACAGCGGTACAGCGAAATCCATCCTGCGGGTAAAGCCGGTGTCCAGGCTAACCGGGATACAGGAGAAGGAGGTAGCGAAGA  
TGCTCAGTGCCTGGACAGTGCCTAACTTTGGTAATCGAGGCCCACTGACGTGGTCTGCCTCAGGCCACTCTCAGCCCCATCCTATCCCTGCTCGGGCCCGTCC  
CCTCAGCTTGTCTTCAATTTTCGCTCTATGAGTCATACTGAGAGGACCTTCAGAAAGTGCCTGGTGGTGGTGGTGGTGGTGGTGGTGGTGGTGGTGGTGGTGGT  
ATACTGGCTGGTAGCCCCGAGGATCAGATCACAGGTTGTCCAGTGACCCCTGCGGGGAGTGGCGAGCCTGGAGAGCCCTCTGCCTGGGAGAATTAACGACGT  
CACAGCCAGAGACGAAAGAACTACAGGTGCGGGGACAGGCTGGCTCCAGGGTAGAGCTTGCAAAAGGACGAGCGTGGGACAGACTGAGGTGGACTGTGTAGT  
TCAGGGCCCGGCGATCCGGCTCCGTAGGCTGCCCTATGTCCTCCCTCGCCCAATCCAGGCCAGCACAGCAGTAACGCCAGCTTAGAGCCTCCCGCCGCGT  
CCTCCACTCCCGCCCCAGTCTCGAAGCCACAGCCAGCCACGCTTTCGCCGGCTGCACCCCGAGGTGCCCGCTGCAGGGCCGGGCGGCGAGGCGCGCTT  
GCCGACGCTCTTTTGTCTGCCAGTACCCAAAAGCGGGGGACGCGTGCATCAGAAATGTGGCAGATTGCGGAATATAGAAAAAGAGGTTACAGTTTCTATGG  
AATGAGAGGTGCCAGGACTTGAAGAAAAATAAACCACATATCCCTCTGCTATATTAAGTGAGAGTCTTAAAAAATAAATTCACGTTA

### PE Sox1(+35)TFBS in Grial promoter

GCCATCATTTCTGTGCACACATCTCTCTTGGGTATCTCCGAGCCAGCTGCAGTCCAGCAGGCTCCACAGAGGCCAGCTTCTCTGGACACAAA  
AATCTGAGTTATAAGTGAAGGCAGCCTGCATCTCCGACTGGAATCAGCGCAAAATGACTCATGTAATTGCCCTGTGCGGTACCTGAATCTT  
CTTGTTCACCCACCCACACAACCTCTGCTGTATAGATTCTGCACCTGCAAGAAAAAAGAGGGAGGGGAGGACAAGTTCAAATACCTAT  
GGTTGCAAAAAGGCCACCGACTAGTCCAGGAGCGTCGTGAGTTATGAGGTAGGAGGGAGCCGCTTGCCATTAATCTGGGAACAAACAGCTAAC  
CCGGTGAAGTGGTATTTTCTTTTCTTTCTCACTTTTCTCAGTGTGGGAAGGCGATTGTGAGCGCTCTGCTGGAATTTGGCAGCGCGGAGG  
CTTGGAGAGCACCCCATGCTGGCTCCTATTCAGCCGGCCAGTTTCTCAGCTTTTGGAGTTTCACTCAGCCGCTGCCTCAATGGCTTACA  
AAGCTGATTACAAGCTTACCGCATTCCTGAAGGAGCCAAAAGCGACAGGTTGCAAAACGAGCCGAGGGAGCCCTTATCCCGGTGACAGAATG  
GGACAAGTGGGAAAGGCTTGGACCACACAAATCCAAGGCTCACCAGGAGCAGAGAGCCTGCCTTGGGAACCGGGGTCATTATCCGCCCTAT  
TCAGCGGACCGGGACCTGGGGCCAAGGAGGCGGGCCGGGCGCAGGAGCGTGTGAGTTATGAGACGCGTSCCTCTCTAAAGATGGAAGGG  
GCTGCTAGCATCCAGGTCCAAGCACAGGCGAGTACACCGAAGCTACTGTGTATGCCCTTCTCAGACTTTCTTTAAATTTCTGGAGAGGG  
ATTTCTAGGGTCTCCCCCTTGGGAATTAGTTGTAGGAATAATGGGCCAGTGGAGTGTAGAAGATATATCCAGCGCAACCCGTCGCTGCACTAC  
TAGAGAAAGTGAAGTGAATCAAGCAGCTGGTGAATCCAGGGCTATTGTGG

### PE Sox1(+35)TFBS+CGI in Grial promoter

GCCATCATTTCTGTGCACACATCTCTCTTGGGTATCTCCGAGCCAGCTGCAGTCCAGCAGGCTCCACAGAGGCCAGCTTCTCTGGACACAAA  
AATCTGAGTTATAAGTGAAGGCAGCCTGCATCTCCGACTGGAATCAGCGCAAAATGACTCATGTAATTGCCCTGTGCGGTACCTGAATCTT  
CTTGTTCACCCACCCACACAACCTCTGCTGTATAGATTCTGCACCTGCAAGAAAAAAGAGGGAGGGGAGGACAAGTTCAAATACCTAT  
GGTTGCAAAAAGGCCACCGACTAGTCCAGGAGCGTCGTGAGTTATGAGGTGAGGAGGGAGCCGCTTGCCATTAATCTGGGAACAAACAGCTAA  
CCCGGTGACTGGTATTTTCTTTTCTTTCTCACTTTTCTCAGTGTGGGAAGGCGATTGTGAGCGCTCTGCTGGAATTTGGCAGCGCGGA  
GGCTTGGAGAGCAGCCCATGCTGGCTCCTATTCAGCCGGCCAGTTTCTCAGCTTTTGGAGTTTCACTCAGCCGCTGCCTCAATGGCTTCA  
CAAAGCTGATTACAAGCTTACGCGATTCCTGAAGGAGCCAAAAGCGACGAGGTTGCAAAACGAGCCGAGGGAGCCCTTATCCCGGTGACAGAA  
TGGGACAAGCTGGGAAAGGCTTGGACCACACAAATCCAAGGCTCACCAGGAGCAGAGAGCCTGCCTTGGGAACCGGGGTCATTATCCGCCCT  
ATTCAGCGGGACCGGGACCTGGGGCAAGGAGGCGGGCCGGGCGCAATCGATGTCATTATCCGCCCTATTCAGCGGGACCGGGGACCCCTGGG  
GCCAAGGAGCCGGCCGGGGCGCAAGCGCCACCGCCAGTACGCGCTGCAGCAGTGGGGACCCCGCTGGGGCTTGCACCCGTCGGGATGTTGGG  
CGCTGCGTTTGTTCACCGACAGCGGTACAGCGAAATCCATCCTGCGGGTAAAGCCGGTGTCCAGGCTAACCGGGATACAGGAGAAGGAGGGT  
AGCGAAGTGTCTCAGTGCCTGGACAGTGCCTAACTTTGGTAATCGAGGCCCACTGACGTGGTCTGCCTCAGGCCACTCTCAGCCCCATCCTA  
TCCCTGCTCGGGCCCGTCCCCTCAGCTTGTCTTCAATTTTTCGCTCTATGAGTCATACTGAGAGCGACCTTCAGAAAAGTGCCTGGTGGTGGG  
GTGGTGGTGGTGGGGGTTAGGGGCGGGGAATACTGGCTGGTAGCCCGCAGGATCAGATCACCAGGTTGTCCAGTGCACCTGCGGGG  
AGTGGCAGCCTGGAGAGCCCTCTGCCTGGGAGAATTAACGACGTACAGCCAGAGACGAAAGAACTACAGGTCGCGGGGACAGGCTGGCTC  
CCAGGGTAGAGCTTGCAAAAGGACGAGCGTGGGACAGACTGAGGTGGACTGTGTAGTTTCCAGGGCCCGCCGATCCGGCTCCGTAGGCTGCC  
CCTATGTCCCTCCCTCGCCCCATCCAGGCCAGCACAGCAGGTAACGGCAGCCTAGAGCCCTCCCGCCGCTCTCCCACTCCCGGCCCCAGC  
TCTGAAGCCACAGCCAGCCACCGCTTTCGCCGGCTGCACCCGAGGTTGCCCGCTGCAGGGCGGGCCGGCAGGGCCGCTTGGCAGCC  
TCTTTTGTCTCCAGGAGCGTCGTGAGTTATGAGAGCGTSCCTCTCTAAAGATGGAAGGGCTGCTAGCATCCAGGTTCAAAGCACAGGCCAGT  
CACACCGAAGCTACTGTGTATGCCCTTCTCAGACTTTCTTTAAATTTCTGGAGAGGGATTTCTAGGGTCTCCCCCTTGGGAATTAGTTGI  
AGGAATAATTTGGGCCAGTGGAGTGTAGAAGATATATCCAGCGCAACCCGTCGCTGCACTACTAGAGAAAGTGACCTAGATCAAGCAGCTGGTGA  
ATCCAGGCTATTGTGG
